# Supplementary material
Source: PubMed Central journal article supplement (PMC3243499)
Supplement: supp_M111.292078_jbc.M111.292078-1.pdf [file supp_M111.292078_jbc.M111.292078-1.pdf]

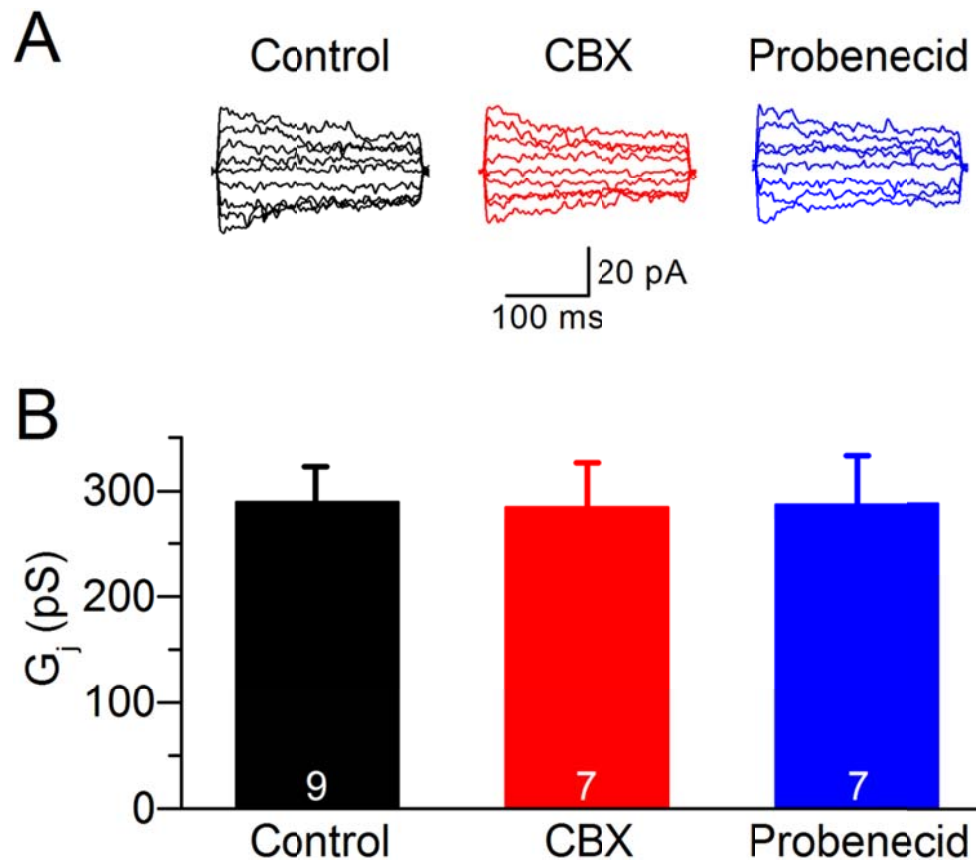

Supplementary Figure 1. **Neither carbenoxolone (CBX) nor probenecid inhibited electrical coupling of *C. elegans* body-wall muscle.** **A**, Sample junctional current traces from control cells and cells treated with either CBX (50  $\mu$ M) or probenecid (100  $\mu$ M). **B**, Comparisons of junctional conductance ( $G_j$ ) among the different groups. Shown are mean  $\pm$  SE. Data are shown as mean  $\pm$  SE. There was no significant difference among the different treatment groups.
